# Supplementary material for: Antimetastatic gene expression profiles mediated by retinoic acid receptor beta 2 in MDA-MB-435 breast cancer cells
Source: PubMed Central journal article supplement (PMC1283145; doi:10.1186/1471-2407-5-140), 2005-10-28
Supplement: 1471-2407-5-140-S1.pdf [file 1471-2407-5-140-S1.pdf]

**Supplemental Table 1: Oligonucleotide sequences of primers for qRT-PCR**

| <b>Rank</b> | <b>Gene</b> | <b>Primers</b>                                               | <b>Product Length</b> | <b>Tm</b> |
|-------------|-------------|--------------------------------------------------------------|-----------------------|-----------|
| 1           | LSAMP       | Fwd GAGAGAGAGAGAGAGAGAGATGG<br>Rev AAAGTTGTGAAATAAACGGTCTCC  | 50                    | 59-60     |
| 2           | SLC38A2     | Fwd TCTCGGGTTAAGGGAAGTGA<br>Rev CATTCTCTGGAATGGAATAAAATTG    | 45                    | 60        |
| 3           | CTAG1       | Fwd TTGTCTGCTGGAGGAGAC<br>Rev TTTTCTACAGAAACAAACATGTAAGC     | 45                    | 58-60     |
| 4           | MGC2780     | Fwd GAGAGAGAGATAGAATTCCAGCAG<br>Rev CCATTCGTGGAATGTGTACTT    | 50                    | 58-59     |
| 5           | PCDH11Y     | Fwd TTATGACCATTAGAACTATTTTGA<br>Rev AATTGAGCCAGTTGGAAAC      | 46                    | 54-55     |
| 6           | PCSK4       | Fwd GAAGTCTCCTCTGCATTTTGG<br>Rev CACTCCC GCCCAAACC           | 36                    | 59-61     |
| 7           | ZADH1       | Fwd ATGGGAGCTGCATTCCAGT<br>Rev CTGCTTTCCAATGTTACCTCCT        | 51                    | 60-61     |
| 8           | CD164       | Fwd GAGTGCTGTAGGATTAATTCGAAAAT<br>Rev GGGAGGAATGGAATTCTGC    | 47                    | 59-60     |
| 9           | SFTPA2      | Fwd AAGCCACACTCCACGACTTC<br>Rev CCCTTGCTCTGCAGGATTTG         | 45                    | 59-60     |
| 10          | FLJ23577    | Fwd TGGCTGTTGGAACATCATGTC<br>Rev TTGGAATGGAAGCGTTGACT        | 48                    | 60-61     |
| 11          | OPRS1       | Fwd TTGAAGTCAGCGTCTTCCATT<br>Rev CAAAGGAAGAATGGGGGTCT        | 47                    | 60        |
| 12          | FABP6       | Fwd CAAGGAAAGCAACATACAGACAA<br>Rev ACAGTGGCCTTGAACGTCTT      | 51                    | 59-60     |
| 13          | OR52P1      | Fwd ACGTTCCAGTCCATATTCACATT<br>Rev GGTGGCAAAAGCAGATAAACA     | 55                    | 60        |
| 14          | CSTA        | Fwd TGAGACTTACGGAAAATTGGAA<br>Rev CAACAACCTGAGTTTTATACTGCACA | 50                    | 59-60     |
| 15          | NPDC1       | Fwd GCATGGAGAACCGTAGAGC<br>Rev TGGCTTTTGTCTCTAGAATTACCC      | 55                    | 58-60     |
| 16          | NXT2        | Fwd TGCTCAGTCCACTCCCAAC<br>Rev TCACTTGCAATCTTCCACACA         | 45                    | 60        |
| 17          | SECTM1      | Fwd CCTCCTAGAACCCAGATGAA<br>Rev GGCTCCCCTCTGAGG              | 46                    | 60-61     |

|    |         |                                                                 |    |       |
|----|---------|-----------------------------------------------------------------|----|-------|
| 18 | HKE2    | Fwd GGGAAAGAGGCTGGACTATATCA<br>Rev GCTGGGATTCGTATCGCTTA         | 52 | 60    |
| 19 | NNMT    | Fwd TGTGAAAGAGGCTGGCTACARev<br>TTTGGCGAGATCACCTCAAAC            | 50 | 59-60 |
| 20 | ST18    | Fwd TTCCACTCCCATGAAACTTTG<br>Rev GCCCACTTAATGCATAACAA           | 46 | 60    |
| 22 | RPL10   | Fwd GGCCAAGTTCAAGTTTCCTG<br>Rev ACTTCTTTGAGATGTGGATCTTCTG       | 50 | 60    |
| 28 | IFITM1  | Fwd CAGCAGTTTATACCCACACACC<br>Rev GCACGTGCACTTTATTGAATG         | 55 | 59    |
| 35 | USP18   | Fwd TCATTTTCCATTTCCGTTCC<br>Rev GCAAAATCTCTTAGAAGACTCCGTA       | 51 | 60    |
| 37 | RNF28   | Fwd ACGATGTGCTGTATTTAGTGTCT<br>Rev TCAGTTACCACCCCGTATGTC        | 51 | 60    |
| 38 | HOXB7   | Fwd ACATGAGAAAGGGAGACGAAGA<br>Rev CCTGATTCAGTTCCCAGAGC          | 50 | 60    |
| 39 | MRPL52  | Fwd GAGGCTTGGCTTAGTACTCTCATC<br>Rev TTACCTGAACTGGAATGGAACC      | 49 | 60    |
| 40 | SPP1    | Fwd CCACAGCCATGAATTCACA<br>Rev TTGGGGTCTACAACCAGCAT             | 51 | 60-61 |
| 42 | NDRG1   | Fwd GCCAGGTTCCCTGTACTACTGC<br>Rev ATCCACGGTGAGCCAAAAT           | 52 | 59-60 |
| 44 | ARHGAP4 | Fwd TCTGCAGCTTTGTGGAAGG<br>Rev CCACCCAGCAGCCACT                 | 41 | 60    |
| 47 | IFIT1   | Fwd CTTTGAGAACTCTGTGAGACAAGG<br>Rev GGCTGATATCTGGGTGCCTA        | 48 | 60    |
| 48 | CYP4Z1  | Fwd ATCAAAACTCCACTCAGTATCTGC<br>Rev GCAGATATTTGCAGAGATAAAAAGTAA | 51 | 58-59 |
| 49 | PABPC3  | Fwd CTTCTTTATATGCTCGAGTCTCC<br>Rev TCATCAACCTTAGAACGGAGTG       | 50 | 57-59 |
| 52 | SSR4    | Fwd CTCAGGAAGGCTCAGAGGAA<br>Rev TAAACAGAGGCGGGATGATG            | 55 | 60    |
| 55 | TYRP1   | Fwd AAACCTTTGGAGAGGGAAAATCT<br>Rev CACAGGCAATATCCATTGTTG        | 54 | 57-59 |
| 65 | TPD52L1 | Fwd GCATGTCCTTGAAGGCTGA<br>Rev CTGCTGAACTGAAAGGGACTG            | 45 | 60    |
| 66 | RPL28   | Fwd GCAATTCCTTCCGCTACAAC<br>Rev CCACAGTCTTGCGGTGAAT             | 45 | 60    |

|    |           |                                                            |    |       |
|----|-----------|------------------------------------------------------------|----|-------|
| 72 | CD19      | Fwd GCCAGCCTGGACCCAAT<br>Rev TAAGAGTCTGCATCTTCCTCATGATT    | 40 | 62    |
| 73 | MAGEA2    | Fwd GCAGTCAGCATTCTTAGCAGTG<br>Rev TCAAAGTCATCCAACAGAACAGA  | 49 | 60    |
| 75 | LOC389903 | Fwd AACCCCAGATAAATAGCCAACA<br>Rev CTCTTTGGGGTGAAAATGTACTCT | 52 | 59-60 |
| 77 | TRAG3     | Fwd AACCCCAGATAAATAGCCAACA<br>Rev CCCTTTGGGGTGAAAACG       | 54 | 60    |
| 81 | IFI27     | Fwd CCAGCGAGGAGCCAACTAT<br>Rev ATTTGGTATATTTACCCCCAGGT     | 51 | 60    |
| 90 | JUN       | Fwd AACTCATGCTAACGCAGCAG<br>Rev CCGACGGTCTCTTCAAAA         | 49 | 59-60 |
| 93 | CTAG2     | Fwd GGTGTCGCCTTTAATGTGATG<br>Rev GCTAAATGTGAGGGGCAGAG      | 43 | 60    |
| 95 | NANS      | Fwd TAGTGGGCAAGAAGGTCCTG<br>Rev TGATGGTGTATCCTCTTCAAC      | 48 | 60    |
| 96 | SDF2L1    | Fwd TTGGCAGAGACTTTGGGTTT<br>Rev AGGCACTTGAGGACCCCTA        | 40 | 60    |
| 98 | TRA1      | Fwd CCTTCTCCCCTGCACTGTAA<br>Rev TGTGACCCATAATCCCACATT      | 41 | 60    |
| 99 | retSDR4   | Fwd TCACAAAGACTATAGGCAATAATGGA<br>Rev TTGTCATCTTGTGGGACTGG | 48 | 60    |
| NA | RPLP0     | Fwd CTGTTGCATCAGTACCCCAT<br>Rev TCGTTTGTACCCGTTGATGA       | 44 | 60    |
