# Supplementary material for: Antimetastatic gene expression profiles mediated by retinoic acid receptor beta 2 in MDA-MB-435 breast cancer cells
Source: PubMed Central journal article supplement (PMC1283145; doi:10.1186/1471-2407-5-140), 2005-10-28
Supplement: 1471-2407-5-140-S4.pdf [file 1471-2407-5-140-S4.pdf]

**Supplemental Table 4: Binding elements detected on chromosome Xq28**

| Sequence                                                                                    | Gene                                                  | Location               | Genomic Architecture                                                                                                                                                                                                                                                                                                                                          |
|---------------------------------------------------------------------------------------------|-------------------------------------------------------|------------------------|---------------------------------------------------------------------------------------------------------------------------------------------------------------------------------------------------------------------------------------------------------------------------------------------------------------------------------------------------------------|
| GGGTCA(AGTGG)AGTTCA<br>GGTTCA(AGATCA)AGTTCA<br>GGTTCA(AGATCA)AGTTCA<br>GGTTCA(TATTTT)AGTTCA | <b>FMR2</b><br>Fragile X mental<br>retardation 2      | Between<br>exons 3 & 4 | 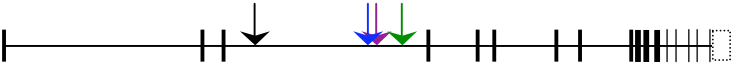<br>147,287,685 - 147,787,753<br><a href="http://www.ncbi.nlm.nih.gov/entrez/query.fcgi?db=gene&amp;cmd=retrieve&amp;dopt=default&amp;list_uids=2334">http://www.ncbi.nlm.nih.gov/entrez/query.fcgi?db=gene&amp;cmd=retrieve&amp;dopt=default&amp;list_uids=2334</a>       |
| AGTTCA(GGAAA)AGTTCA                                                                         | <b>CXorf6</b><br>Chromosome X open<br>reading frame 6 | Between<br>exons 4 & 5 | <br>149,284,288 - 149,353,007<br><a href="http://www.ncbi.nlm.nih.gov/entrez/query.fcgi?db=gene&amp;cmd=Retrieve&amp;dopt=Graphics&amp;list_uids=10046">http://www.ncbi.nlm.nih.gov/entrez/query.fcgi?db=gene&amp;cmd=Retrieve&amp;dopt=Graphics&amp;list_uids=10046</a>   |
| AGTTCA(CAGAC)AGTTCA                                                                         | <b>GAB3</b><br>GRB2-associated<br>binding protein 3   | Between<br>exons 8 & 9 | <br>153,543,036 - 153,467,235<br><a href="http://www.ncbi.nlm.nih.gov/entrez/query.fcgi?db=gene&amp;cmd=Retrieve&amp;dopt=Graphics&amp;list_uids=139716">http://www.ncbi.nlm.nih.gov/entrez/query.fcgi?db=gene&amp;cmd=Retrieve&amp;dopt=Graphics&amp;list_uids=139716</a> |

Arrows indicate approximate location of binding elements. Dotted lines indicate untranslated regions. Nine-digit numbers specify chromosomal locations (start-end) of the genes.

URL to Entrez Gene link provided.
